# Supplementary material for: Effects of a reservoir flushing on trace metal partitioning, speciation and benthic invertebrates in the floodplain
Source: Royal Society of Chemistry journal article supplement (doi:10.1039/c4em00387j), 2014-09-30
Supplement: c4em00387j1.pdf [file c4em00387j1.pdf]

## Supplementary Information

### **Effects of a reservoir flushing on trace metal partitioning, speciation and benthic invertebrates in the floodplain**

Dorothea Hug Peter<sup>a,b</sup>, Emmanuel Castella<sup>a,b</sup> and Vera I. Slaveykova<sup>a,b,\*</sup>

<sup>a</sup> University of Geneva, Faculty of Sciences, Earth and Environmental Sciences, Institute F.-A. Forel, Rte Suisse 10, CH-1290 Versoix, Switzerland

<sup>b</sup> University of Geneva, Institute for Environmental Sciences, Uni Rondeau, Battelle, Rte de Drize 7, CH-1227 Carouge, Switzerland

\*Corresponding author: vera.slaveykova@unige.ch

The supplementary information contains 4 Tables and 2 Figures

Table S1. Expected changes in relative frequencies of individuals with selected traits linked to the two stressors: suspended/deposited sediment and contaminants.

|                    | Sediment                                         | Contaminants       |
|--------------------|--------------------------------------------------|--------------------|
| Tegument           | (+) <sup>1</sup>                                 |                    |
| Gill               | no change <sup>2</sup>                           | (-) <sup>2</sup>   |
| Gatherer/Collector | (+) <sup>1,3</sup>                               |                    |
| Filtrer            | (+) <sup>4</sup> (-) <sup>1,3</sup>              | (+) <sup>5</sup>   |
| Scraper            | (-) <sup>2,4</sup> , no<br>change <sup>1,2</sup> | (-) <sup>5</sup>   |
| Shredder           |                                                  | (-) <sup>5</sup>   |
| Burrowing          | (+) <sup>2,4</sup>                               |                    |
| Climbing           | (+) <sup>2</sup>                                 |                    |
| Clinger            | (-) <sup>2</sup>                                 |                    |
| Crawler            | (-) <sup>1,4</sup>                               | (-) <sup>5</sup>   |
| Large body         | (-) <sup>1,2</sup>                               | (+) <sup>2,5</sup> |

1. C. Buendia, C. N. Gibbins, D. Vericat, R. J. Batalla, and A. Douglas, *Ecol. Indic.*, 2013, 25, 184–196.
2. B. Statzner and L. A. Bêche, *Freshw. Biol.*, 2010, 55, 80–119.
3. C. F. Rabení, K. E. Doisy, and L. D. Zweig, *Aquat. Sci.*, 2005, 67, 395–402.
4. C. P. Mondy and P. Usseglio-Polatera, *Sci. Total Environ.*, 2013, 461-462, 750–60.
5. V. Archaimbault, P. Usseglio-Polatera, J. Garric, J.-G. Wasson, and M. Babut, *Freshw. Biol.*, 2009, 55, 1430–1446.

**Table S1.** Logarithm of the suspended particulate matter /water partitioning coefficients ( $\log K_D$ ) calculated for different sampling sites.

| Metal    | Al    | Cr    | Co    | Ni    | Cu    | Pb    |
|----------|-------|-------|-------|-------|-------|-------|
| P before | 2.229 | 1.443 | 1.777 | 1.086 | 1.483 | 2.568 |
| During   | 1.555 | 1.067 | 1.586 | 1.039 | 1.524 | 2.463 |
| End      | 1.724 | 0.996 | 1.064 | 0.482 | 1.723 | 2.515 |
| S before | 2.458 | 1.239 | 1.644 | 0.935 | 1.354 | 2.494 |
| During   | 1.305 | 1.301 | 1.278 | 0.787 | 1.535 | 2.182 |
| End      | 1.756 | 1.176 | 1.327 | 0.53  | 1.695 | 3.161 |
| B before | 2.68  | 1.461 | 1.883 | 1.154 | 1.319 | 2.521 |
| During   | 1.419 | 0.817 | 1.122 | 0.374 | 0.906 | 1.595 |
| End      | 1.202 | 1.042 | 1.314 | 0.468 | 1.377 | 2.966 |
| C before | 2.5   | 1.491 | 1.77  | 1.199 | 1.233 | 2.089 |
| During   | 1.359 | 1.323 | 1.163 | 0.562 | 1.476 | 2.055 |
| End      | 1.954 | 1.414 | 1.483 | 0.597 | 1.665 | 3.55  |

Table S3. Determination level of the groups of invertebrate taxa found in the secondary channel.

---

|               |         |
|---------------|---------|
| Amphipoda     | species |
| Bivalvia      | genus   |
| Coleoptera    | genus   |
| Diptera       | famille |
| Ephemeroptera | species |
| Gasteropoda   | famille |
| Heteroptera   | genus   |
| Hirudinea     | species |
| Hydrachnidia  | phylum  |
| Hymenoptera   | species |
| Isopoda       | species |
| Lepidoptera   | species |
| Lepidoptera   | species |
| Megaloptera   | species |
| Odonata       | species |
| Plecoptera    | genus   |
| Trichoptera   | genus   |
| Tubellaria    | genus   |

---

Table S4: Simplified traits of the four invertebrate taxa (modified from Mondy<sup>35</sup>)

| Taxon                  | Respiration |       | Locomotion and substrate relations |         |          |              |                      | Food             |                     |                    |                    |                      |                           | Feeding habits            |             |          |         |               |         |          |          |
|------------------------|-------------|-------|------------------------------------|---------|----------|--------------|----------------------|------------------|---------------------|--------------------|--------------------|----------------------|---------------------------|---------------------------|-------------|----------|---------|---------------|---------|----------|----------|
|                        | tegument    | gills | swimmer, full water                | crawler | burrower | interstitial | temporarily attached | detritus (< 1mm) | dead plant (>= 1mm) | living microphytes | living macrophytes | dead animal (>= 1mm) | living microinvertebrates | living macroinvertebrates | vertebrates | shredder | scraper | filter-feeder | piercer | predator | parasite |
| <i>Corbicula</i>       | X           | X     | X                                  | X       | X        |              |                      | X                |                     | X                  |                    |                      | X                         |                           |             |          |         | X             |         |          |          |
| <i>Dikerogammarus</i>  |             | X     | X                                  | X       |          | X            |                      | X                | X                   | X                  | X                  | X                    | X                         |                           | X           | X        |         |               |         |          |          |
| <i>Gammarus</i>        |             | X     | X                                  | X       |          | X            |                      | X                | X                   | X                  | X                  | X                    | X                         |                           | X           | X        |         |               |         |          |          |
| <i>Glossiphoniidae</i> | X           |       |                                    | X       | X        |              | X                    |                  |                     |                    |                    |                      |                           | X                         | X           |          |         |               | X       |          | X        |

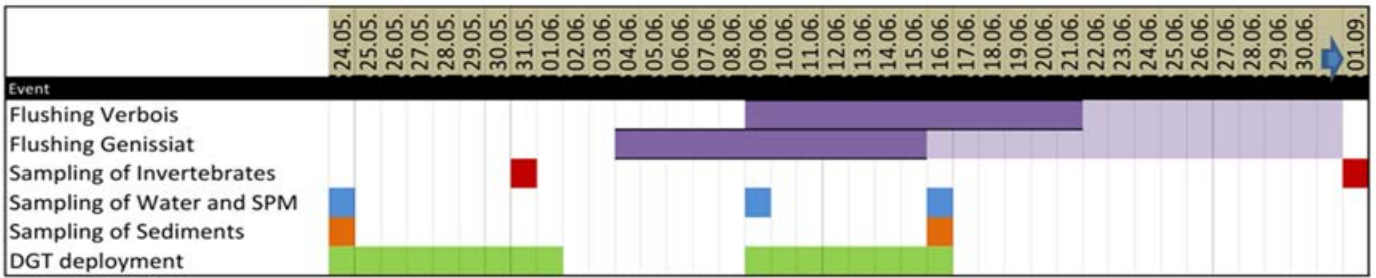

**Figure S1.** Timeline of the flushing and sampling dates. Planned flushing windows are in deep purple. The deep purple shade indicates that suspended solid concentrations remained high after the end of the actual operations.

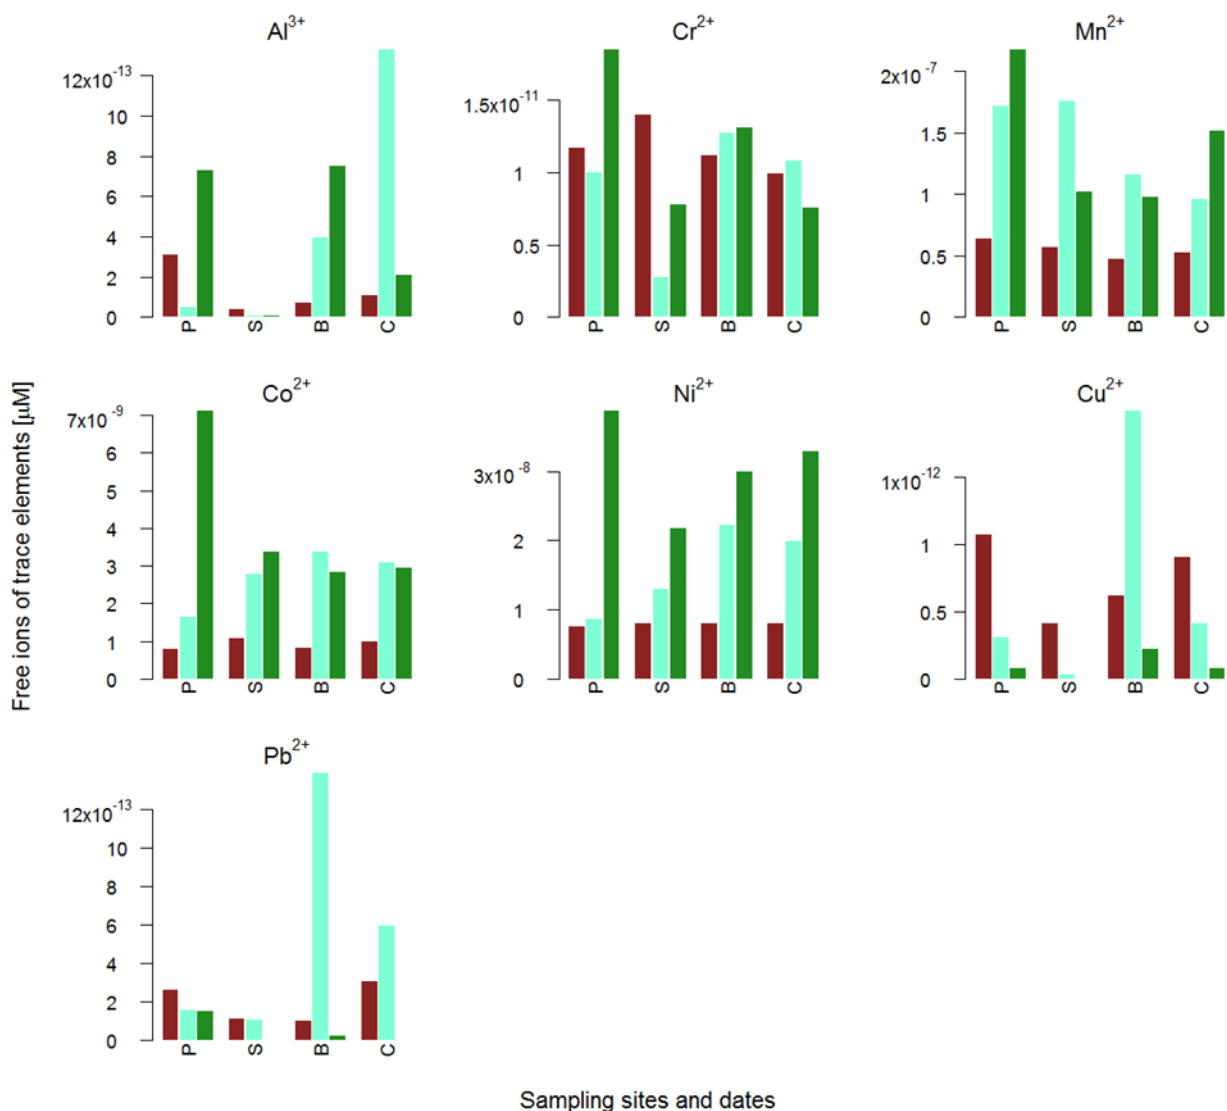

**Figure S2.** Concentrations of the free ion, calculated with Visual Minteq. P, S, B, and C are the sampling sites. The three colours correspond to the three sampling dates, red for the control date before the flushing, blue and green for the two sampling dates during the flushing.
